# Supplementary material for: Intersecting single-cell transcriptomics and genome-wide association studies identifies crucial cell populations and candidate genes for atherosclerosis
Source: bioRxiv or medRxiv preprint supplement (doi:10.1101/2021.11.23.21266487), 2021-11-24
Supplement: Supplementary file [file media-1.pdf]

**Supplemental Table 1. List of included GWAS.**

|   | Trait or disease               | Abbreviation | Category                | Sample size | Consortium             | PMID     | Reference                             | Journal              | Ancestry       |
|---|--------------------------------|--------------|-------------------------|-------------|------------------------|----------|---------------------------------------|----------------------|----------------|
| 1 | Coronary Artery Disease        | CAD          | Atherosclerotic disease | 154654      | CARDIoGRAMplusC4D+UKBB | 28714975 | Nelson et. al, 2017 <sup>3</sup>      | nature genetics      | European       |
| 2 | Coronary Artery Calcification  | CAC          | Atherosclerotic disease | 15523       |                        | 23561647 | Van Setten et al. 2013 <sup>5</sup>   | Atherosclerosis      | European       |
| 3 | Carotid Intima-Media Thickness | clMT         | Atherosclerotic disease | 71128       | CHARGE                 | 30510157 | Franceschini et al. 2018 <sup>6</sup> | nature communication | Multi ancestry |
| 4 | Plaque Presence                | Plaque       | Atherosclerotic disease | 48434       | CHARGE                 | 30510157 | Franceschini et al. 2018 <sup>6</sup> | nature communication | Multi ancestry |
| 5 | Cardio-Embolic stroke          | CES          | Cardiometabolic traits  | 521612      | MEGASTROKE             | 29531354 | Malik et al., 2019 <sup>4</sup>       | nature genetics      | European       |

|    |                            |      |                        |        |            |   |         |                                    |                 |                |
|----|----------------------------|------|------------------------|--------|------------|---|---------|------------------------------------|-----------------|----------------|
| 6  | Any stroke                 | AS   | Cardiometabolic traits | 446696 | MEGASTROKE | 4 | 2953135 | Malik et al., 2019 <sup>4</sup>    | nature genetics | European       |
| 7  | Any Ischemic stroke        | IS   | Cardiometabolic traits | 446696 | MEGASTROKE | 4 | 2953135 | Malik et al., 2019 <sup>4</sup>    | nature genetics | European       |
| 8  | Small Vessel Disease       | SVD  | Cardiometabolic traits | 446696 | MEGASTROKE | 4 | 2953135 | Malik et al., 2019 <sup>4</sup>    | nature genetics | European       |
| 9  | Large Artery Stroke        | LAS  | Cardiometabolic traits | 446696 | MEGASTROKE | 4 | 2953135 | Malik et al., 2019 <sup>4</sup>    | nature genetics | European       |
| 10 | Atrial Fibrillation        | AF   | Cardiometabolic traits | 588190 |            | 5 | 2989201 | Roselli et al., 2018 <sup>43</sup> | nature genetics | Multi ancestry |
| 11 | Heart Failure              | HF   | Cardiometabolic traits | 488010 |            | 2 | 3058672 | Aragam et al. 2018 <sup>44</sup>   | Circulation     | European       |
| 12 | Nonischemic Cardiomyopathy | NICM | Cardiometabolic traits | 488010 |            | 2 | 3058672 | Aragam et al. 2018 <sup>44</sup>   | Circulation     | European       |

|    |                          |     |                        |         |      |          |                                                        |                 |          |
|----|--------------------------|-----|------------------------|---------|------|----------|--------------------------------------------------------|-----------------|----------|
| 13 | High-Density Lipoprotein | HDL | Cardiometabolic traits | 1888577 | GLGC | 24097068 | Global lipids Genetics Consortium , 2013 <sup>30</sup> | nature genetics | European |
| 14 | Low-Density Lipoprotein  | LDL | Cardiometabolic traits | 1888577 | GLGC | 24097068 | Global lipids Genetics Consortium , 2013 <sup>30</sup> | nature genetics | European |
| 15 | Total Cholesterol        | TC  | Cardiometabolic traits | 1888577 | GLGC | 24097068 | Global lipids Genetics Consortium , 2013 <sup>30</sup> | nature genetics | European |
| 16 | Triglycerides            | TG  | Cardiometabolic traits | 1888577 | GLGC | 24097068 | Global lipids Genetics Consortium , 2013 <sup>30</sup> | nature genetics | European |
| 17 | Pulse Pressure           | PP  | Cardiometabolic traits | 1050906 |      | 30224653 | Evangelou et al., 2018 <sup>45</sup>                   | nature genetics | European |

|    |                                |          |                        |             |     |              |                                                               |                 |          |
|----|--------------------------------|----------|------------------------|-------------|-----|--------------|---------------------------------------------------------------|-----------------|----------|
| 18 | Diastolic<br>Blood<br>Pressure | DBP      | Cardiometabolic traits | 105090<br>6 |     | 3022465<br>3 | Evangelou et al.,<br>2018 <sup>45</sup>                       | nature genetics | European |
| 19 | Systolic<br>Blood<br>Pressure  | SBP      | Cardiometabolic traits | 105090<br>6 |     | 3022465<br>3 | Evangelou et al.,<br>2018 <sup>45</sup>                       | nature genetics | European |
| 20 | Cigarettes<br>per Day          | CpD      | Cardiometabolic traits | 74035       | TAG | 2041889<br>0 | The Tobacco and<br>Genetics<br>Consortium, 2010 <sup>46</sup> | nature genetics | European |
| 21 | Ever smoked                    | EvrSmk   | Cardiometabolic traits | 74035       | TAG | 2041889<br>0 | The Tobacco and<br>Genetics<br>Consortium, 2010 <sup>46</sup> | nature genetics | European |
| 22 | Onset<br>Smoking               | logOnset | Cardiometabolic traits | 74035       | TAG | 2041889<br>0 | The Tobacco and<br>Genetics<br>Consortium, 2010 <sup>46</sup> | nature genetics | European |

|    |                                  |           |                        |        |         |          |                                                         |                          |          |
|----|----------------------------------|-----------|------------------------|--------|---------|----------|---------------------------------------------------------|--------------------------|----------|
| 23 | Former Smoker                    | FmrSmk    | Cardiometabolic traits | 74035  | TAG     | 20418890 | The Tobacco and Genetics Consortium, 2010 <sup>46</sup> | nature genetics          | European |
| 24 | Type 2 Diabetes                  | T2D       | Cardiometabolic traits | 898130 | DIAGRAM | 30297969 | Mahajan et al., 2016 <sup>47</sup>                      | nature genetics          | European |
| 25 | Type 2 Diabetes adjusted for BMI | T2DadjBMI | Cardiometabolic traits | 898130 | DIAGRAM | 30297969 | Mahajan et al., 2016 <sup>47</sup>                      | nature genetics          | European |
| 26 | Body Mass Index                  | BMI       | Cardiometabolic traits | 693529 | GIANT   | 30124842 | Yengo et al., 2018 <sup>48</sup>                        | Human Molecular Genetics | European |
| 27 | Alzheimer's Disease              | AD        | Other                  | 455258 |         | 30617256 | Jansen et al., 2019 <sup>49</sup>                       | nature genetics          | European |
| 28 | Autism Spectrum Disorder         | ASD       | Other                  | 46350  | PGC     | 30804558 | Grove et al., 2019 <sup>50</sup>                        | nature genetics          | European |

|    |                           |             |       |        |     |              |                                   |                 |          |
|----|---------------------------|-------------|-------|--------|-----|--------------|-----------------------------------|-----------------|----------|
| 29 | Bipolar Disorder          | BIP         | Other | 198882 | PGC | 3104375<br>6 | Stahl et al., 2019 <sup>51</sup>  | nature genetics | European |
| 30 | Depressive symptoms       | DS          | Other | 298420 |     | 2708918<br>1 | Okbay et al., 2016 <sup>52</sup>  | nature genetics | European |
| 31 | Educational Attainment    | EA          | Other | 293723 |     | 2722512<br>9 | Okbay et al., 2016 <sup>53</sup>  | nature genetics | European |
| 32 | Insomnia                  | Insomnia    | Other | 386533 |     | 3080456<br>5 | Jansen et al., 2018 <sup>49</sup> | nature genetics | European |
| 33 | Intelligence Quotient     | IQ          | Other | 269867 |     | 2994208<br>6 | Savage et al., 2018 <sup>54</sup> | nature genetics | European |
| 34 | Major Depression Disorder | MDD         | Other | 480359 | PGC | 2970047<br>5 | Wray et al., 2018 <sup>55</sup>   | nature genetics | European |
| 35 | Neuroticism               | Neuroticism | Other | 298420 |     | 2708918<br>1 | Okbay et al., 2016 <sup>52</sup>  | nature genetics | European |

|    |                                      |        |       |             |       |              |                                           |                          |                |
|----|--------------------------------------|--------|-------|-------------|-------|--------------|-------------------------------------------|--------------------------|----------------|
| 36 | Parkinson's<br>Disease               | PD     | Other | 145630<br>6 |       | 3170189<br>2 | Nalls et al.,2019 <sup>56</sup>           | The Lancet.<br>Neurology | European       |
| 37 | Asthma                               | Asthma | Other | 142486      |       | 2927380<br>6 | Deménais et al.,<br>2018 <sup>57</sup>    | nature genetics          | Multi ancestry |
| 38 | Inflammatory<br>Bowel<br>Disease     | IBD    | Other | 86640       |       | 2619291<br>9 | Liu et al., 2015 <sup>58</sup>            | nature genetics          | Multi ancestry |
| 39 | Breast<br>Cancer                     | BC     | Other | 256123      |       | 2905968<br>3 | Michailidou et al.,<br>2017 <sup>59</sup> | nature                   | Multi ancestry |
| 40 | Prostate<br>Cancer                   | PrCa   | Other | 140306      |       | 2989201<br>6 | Schumacher et al.,<br>2018 <sup>60</sup>  | nature genetics          | European       |
| 41 | Amyotrophic<br>Lateral<br>Sclerosis  | ALS    | Other | 43259       |       | 2745534<br>8 | van Rheenen et<br>al., 2016 <sup>61</sup> | nature genetics          | European       |
| 42 | Femoral<br>Neck Bone<br>Mass Density | FNBMD  | Other | 53236       | GEFOS | 2636779<br>4 | Zheng et al.,<br>2015 <sup>62</sup>       | nature                   | European       |

|    |                                      |        |       |        |       |              |                                     |                             |          |
|----|--------------------------------------|--------|-------|--------|-------|--------------|-------------------------------------|-----------------------------|----------|
| 43 | Forarm Bone<br>Mass Density          | FABMD  | Other | 53236  | GEFOS | 2636779<br>4 | Zheng et al.,<br>2015 <sup>62</sup> | nature                      | European |
| 44 | Lumbar<br>Spine Bone<br>Mass Density | LSBMD  | Other | 53236  | GEFOS | 2636779<br>4 | Zheng et al.,<br>2015 <sup>62</sup> | nature                      | European |
| 45 | Height                               | Height | Other | 693529 | GIANT | 3012484<br>2 | Yengo et al.,<br>2018 <sup>48</sup> | Human Molecular<br>Genetics | European |
| 46 | Subjective<br>Well-Being             | SWB    | Other | 298420 |       | 2708918<br>1 | Okbay et al.,<br>2016 <sup>52</sup> | nature genetics             | European |
